# Supplementary material
Source: publisher figshare collection journal article supplement (https://plos.figshare.com/articles/dataset/_/4486754)
Supplement: Supplementary file [file 1]

## Supporting information

### S1 Appendix

#### Proof of wave existence

##### Bistable case

We begin with the case where  $a > 1$ . Then the stationary points  $w = 0$  and  $w = 1 - b$  of the corresponding equation  $dw/dt = F(w)$  are stable. Instead of the second-order equations in (20) we will consider the systems of the first-order equations:

$$w' = p, \quad p' = -cp - kw(1 - b - w) \quad (1)$$

and

$$w' = p, \quad p' = -cp - kw(1 - a - w). \quad (2)$$

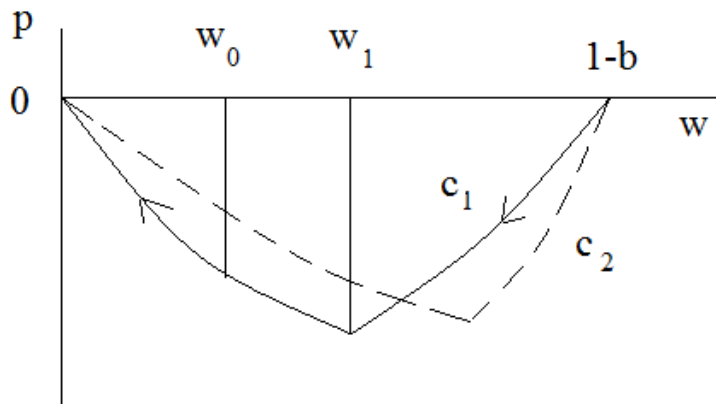

**Fig 1.** Trajectories of systems (1) and (2) for  $c = c_1$  (solid lines) leaving the saddle point  $(1 - b, 0)$  and approaching the saddle point  $(0, 0)$ . They intersect at  $w = w_1$ , that is  $w(0) = w_1$  and  $w(c\tau) = w_0$ . The same trajectories for  $c = c_2$  (dashed lines).

Consider the trajectory  $\gamma_1$  of the first system for  $c = c_1$  leaving the saddle point  $(1 - b, 0)$  in the half-plane  $p < 0$ , and the trajectory  $\gamma_0$  of the second system for  $c = c_1$  approaching another saddle point  $(0, 0)$  from the same half-plane.

Consider  $p$  as a function of  $w$  for the solutions of systems (1), (2), and denote by  $p_1(w; c_1)$  the function corresponding to the trajectory  $\gamma_1$ . Similarly, let  $p_0(w; c_1)$  be the function corresponding to the trajectory  $\gamma_0$ . Due to the properties of systems (1), (2), both these functions are defined on the interval  $0 \leq w \leq 1 - b$ , and

$$p_0(0; c_1) = 0, \quad p_0(1 - b; c_1) < 0; \quad p_1(0; c_1) \leq 0, \quad p_1(1 - b; c_1) = 0.$$

Then there is a solution of the equation

$$p_0(w; c) = p_1(w; c) \quad (3)$$

( $c = c_1$ ) for some  $w_1 \in (0, 1 - b)$ . We have

$$\frac{dp_0(w_1; c_1)}{dw} = -c_1 - \frac{k w_1(1 - a - w_1)}{p_0(w_1; c_1)} < -c_1 - \frac{k w_1(1 - b - w_1)}{p_1(w_1; c_1)} = \frac{dp_1(w_1; c_1)}{dw}. \quad (4)$$

Therefore solution of Eq (3) in the interval  $(0, 1 - b)$  is unique.

**Lemma 1.** *Solution  $w_1$  of Eq (3) is a decreasing function of  $c$ . Moreover,  $w_1(c) = 0$  for  $c \geq c_0$ , and  $w_1(c) \rightarrow 1 - b$  as  $c \rightarrow -\infty$ . Here  $c_0$  is the minimal speed for there exists a  $[0, 1 - b]$ -trajectory of systems (1).*

**Proof.** It can be easily verified that

$$p_0(w; c_2) > p_0(w; c_1), \quad p_1(w; c_2) > p_1(w; c_1), \quad 0 < w < 1 - b$$

for  $c_2 < c_1$  (Fig 1). Therefore  $w_1(c_2) > w_1(c_1)$ .

Let us note that  $(0, 0)$  is a stable node of system (1) if  $c \geq 2\sqrt{k(1 - b)}$ , and  $(1 - b, 0)$  is a saddle point. If the previous condition on  $c$  is satisfied, then there is a trajectory connecting them such that it entirely belongs to the half-strip  $0 < w < 1 - b$ ,  $p < 0$ . If  $c < 2\sqrt{k(1 - b)}$ , then the trajectory connecting these stationary points exists, but it does not belong to the half-strip.

Thus,  $p_1(0; c) = 0$  for  $c \geq 2\sqrt{k(1 - b)}$ . Moreover  $p_0(w; c) < p_1(w; c)$  for  $0 < w \leq 1 - b$ . Indeed, since  $p_0(0; c) = p_1(0; c) = 0$ , then this assertion follows from the estimate (4) for the derivatives at the intersection point.

It remains to verify that  $w_1(c) \rightarrow 1 - b$  as  $c \rightarrow -\infty$ . It follows from the monotonicity of solutions with respect to  $c$ : the function  $p_0(w; c)$  increases and the function  $p_1(w; c)$  decreases for each  $w$  as  $c$  decreases.

By virtue of Lemma 1, there exists a unique value  $c = c_0$  such that  $w_1(c_0) = w_0$ . The following lemma gives a condition under which  $c_0 > 0$ .

**Lemma 2.** *Let  $w_1(c_0) = w_0$ . Then  $c_0 > 0$  if and only if*

$$3(a - b)w_0^2 < (1 - b)^3. \quad (5)$$

**Proof.** It is sufficient to compare the values of the functions  $p_0(w; c)$  and  $p_1(w; c)$  for  $w = w_0$  and  $c = 0$ . Namely, we require that  $p_0(w_0; 0) > p_1(w_0; 0)$ . From (1) we have for  $c = 0$ :

$$p \frac{dp}{dw} = -kw(1 - b - w).$$

Integrating this equation between  $w_0$  and  $1 - b$ , we obtain

$$p_1^2(w_0; 0) = 2k \left( \frac{1}{6}(1 - b)^3 - \frac{1 - b}{2}w_0^2 + \frac{1}{3}w_0^3 \right).$$

Similarly, from (2),

$$p_0^2(w_0; 0) = 2k \left( \frac{a - 1}{2}w_0^2 + \frac{1}{3}w_0^3 \right).$$

Condition (5) follows from the inequality  $p_1^2(w_0; 0) > p_0^2(w_0; 0)$ .

We can now prove the theorem on the existence of waves.

**Theorem 3.** *Let  $a > 1$ ,  $0 < w_0 < 1 - b$  and condition (5) be satisfied. Then for any  $\tau > 0$  there is a unique positive value of  $c$  for which there exists a solution of problem (19)-(21).*

**Proof.** By virtue of Lemmas 1 and 2, there exists a unique value  $c_0 > 0$  such that  $w_1(c_0) = w_0$ . Let us choose some  $c$  such that  $w_1(c) > w_0$  and consider the second equation in (20). Then  $w(0) = w_1(c)$  and  $w(x_0) = w_0$  for some  $x_0 > 0$ . We will show that we can choose  $c$  such that  $x_0 = c\tau$ .

Let us determine how  $x_0$  depends on  $c$ . Consider the trajectories of systems (1), (2) for  $c_1$  and  $c_2$  (Fig 1). If  $c_2 < c_1$ , then

$$p_0(w; c_1) < p_0(w; c_2), \quad w_0 \leq w \leq w_1(c_1). \quad (6)$$

Hence  $x_0(c_2) > x_0(c_1)$ . Indeed, the arc of the trajectory  $p_0(w; c_2)$  consists of two parts. The first one between the values  $w_0$  and  $w_1(c_1)$ , the second one between the values  $w_1(c_1)$  and  $w_1(c_2)$ . Therefore we can set  $x_0(c_2) = x_1(c_2) + x_2(c_2)$ , where  $x_1(c_2)$  and  $x_2(c_2)$  are the lengths of the intervals corresponding to these arcs. It follows from inequality (6) that  $x_1(c_2) > x_0(c_1)$ . Then we get  $x_0(c_2) > x_0(c_1)$ .

Thus,  $x_0(c_0) = 0$  and  $x_0(c)$  is a decreasing function. Since  $c_0 > 0$ , then there exists a unique positive solution of the equation  $x_0(c) = c\tau$ .

## Monostable case

As above, we consider problem (18), (19) with function (17) and reduce it to problem (19)-(21). We will assume in this section that  $0 < a < b < 1$  and  $0 < w_0 < 1 - b$ . Then system (1) has two stationary points for  $0 \leq w \leq 1$ ,  $(0, 0)$  is a node or a focus, depending on the value of  $c$ , and  $(1 - b, 0)$  is a saddle point. System (2) has only one stationary point  $(0, 0)$ , which is a node or focus. We suppose that  $c \geq 2\sqrt{1 - a}$ . Then the point  $(0, 0)$  is a stable node for both systems.

**Theorem 4.** *Suppose that  $0 < a < b < 1$  and  $0 < w_0 < 1 - b$ . Then for any  $c \geq 2\sqrt{1 - a}$  there exists a solution of problem (18), (19) with function (17).*

**Proof.** Consider the function  $p_1(w; c)$  with  $c \geq 2\sqrt{1 - a}$  corresponding to the trajectory of system (1) leaving the stationary point  $(1 - b, 0)$  into the half-plane  $p < 0$ . It approaches the point  $(0, 0)$  since  $c$  is greater than the minimal wave speed  $2\sqrt{1 - b}$  for this system. Hence  $p_1(0; c) = p_1(1 - b; c) = 0$ .

Let  $p_0(w; c)$  be the function corresponding to a trajectory of system (2) approaching the stationary point  $(0, 0)$  and such that

$$p_0(w_1; c) = p_1(w_1; c) \quad (7)$$

for some  $w_1 \in (0, 1 - b)$ . Then

$$\frac{dp_0(w_1; c)}{dw} = -c - \frac{w(1 - a - w_1)}{p_0(w_1; c)} > -c - \frac{w(1 - b - w_1)}{p_1(w_1; c)} = \frac{dp_1(w_1; c)}{dw}. \quad (8)$$

This inequality determines the mutual direction of the trajectories of systems (1) and (2) at the intersection points (Fig 2).

Set

$$p(w) = \begin{cases} p_0(w; c) & , \quad 0 \leq w \leq w_1 \\ p_1(w; c) & , \quad w_1 \leq w \leq 1 - b \end{cases}$$

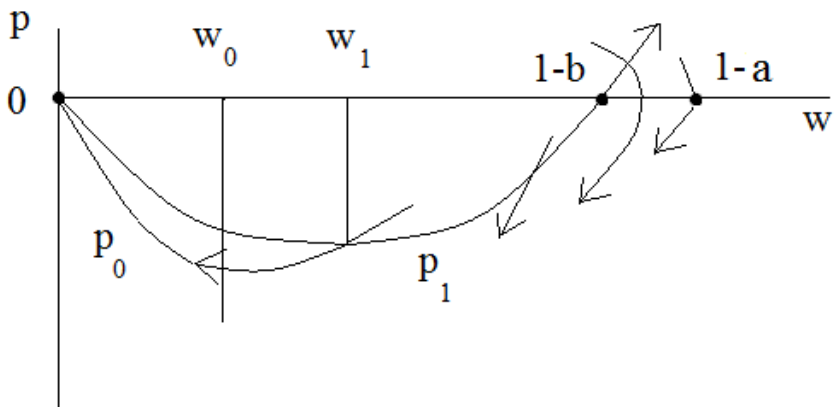

**Fig 2.** Trajectories of systems (1) and (2) in the monostable case.

and the corresponding function  $w(x)$  such that  $w'(x) = p(w(x))$ . It is a solution of equations (20). It is continues together with its first derivative. We have  $w(0) = w_1$ ,  $w(x_0) = w_0$ . We need to choose the value  $w_1$  in order to satisfy the last condition in (21), that is  $x_0 = c\tau$ .

Let us note that for any  $c \geq 2\sqrt{1-a}$ , all trajectories of system (2) crossing the points  $(w, p_1(w; c))$  on the trajectory of system (1) approach the stationary point  $(0, 0)$ . If we vary  $w_1$  from  $w_0$  to  $1-b$ , then the corresponding value of  $x_0$  increases from 0 to some value which is finite since  $(1-b, 0)$  is not a stationary point for system (2). Therefore there exists a maximal delay  $\tau = \tau_m$  for which the solution remains monotone as a function of  $x$ . For  $\tau > \tau_m$  we consider the intersection with the trajectory of system (1) leaving the stationary point  $(0, 0)$  in the half-plane  $p > 0$  (Fig 2). Therefore for any  $\tau > 0$  there exists a value  $w_1$  such that  $x_0 = c\tau$ . If  $w_1 > 1-b$ , then the solution is not monotone.
