# Supplementary material
Source: publisher figshare collection journal article supplement (https://plos.figshare.com/articles/dataset/_/4486754)
Supplement: Supplementary file [file 1]

## Supporting information

### S1 Table

**S1 Table. Overview of available mathematical models of spatial virus spread**

| Model                                    | Modelling formalism                                                                                          | Key assumptions                                                             | Predictions                                                                                                                                                                                                                        | Applications                                                                                                                                                      |
|------------------------------------------|--------------------------------------------------------------------------------------------------------------|-----------------------------------------------------------------------------|------------------------------------------------------------------------------------------------------------------------------------------------------------------------------------------------------------------------------------|-------------------------------------------------------------------------------------------------------------------------------------------------------------------|
| HIV propagation in space and in time [1] | 3D stochastic cellular automata                                                                              | Diffusion-limited propagation of HIV by infected CD4+ cells                 | Excitable medium type of behavior. Stability- and geometry limited regimes of viral spread. Propagations regimes (1) travelling wave, (2) chaotic steady state, (3) extinguishing of infection                                     | Relevant for in vitro system as the effect of CD8+ T T cell is not considered                                                                                     |
| VSV growth and spread [2]                | Set of reaction-diffusion PDEs, ODEs, Integro-differential PDEs                                              | 2D radial symmetry, infection of kidney cells, IFN response                 | Estimated of the parameters of VSV-BHK infection growth and spread                                                                                                                                                                 | In vitro studies of spatially spreading viruses over multiple generations characterized by immuno-histochemical labeling and digital imaging                      |
| IAV infection of humans [3, 4]           | 2D square lattice cellular automation [3]; two-dimensional sheet of hexagonally -tilled epithelial cells [4] | Infection grows locally around infected site by spreading from cell-to-cell | Distribution of initially infected cells has a great impact on the infection dynamics, the impact of the local versus global regeneration rules, the importance of occasional jumps in viral spread to previously uninfected areas | Target-cell limited resolution of infection, sustainable spread of infection as a propagating wave, low level (2% of infected cells) persistence of infection [3] |

| Model                                                                                                | Modelling formalism                                                        | Key assumptions                                                                                                                                 | Predictions                                                                                                    | Applications                                                                                                                                              |
|------------------------------------------------------------------------------------------------------|----------------------------------------------------------------------------|-------------------------------------------------------------------------------------------------------------------------------------------------|----------------------------------------------------------------------------------------------------------------|-----------------------------------------------------------------------------------------------------------------------------------------------------------|
| Multi-compartment virus-target cell-immune cell dynamics with a local random spread of the virus [5] | System of ODEs for basic virus-immune dynamics at 21x21 site grid          | Sessile target and infected cells. Spatial coupling by nearest neighborhood dispersal of the virus, predator-prey type of virus-immune dynamics | A robust persistence of infection for intermediate dispersal rate; rejected the “dynamic elimination” paradigm | Analysis of HIV and SIV dynamics around the viral set point                                                                                               |
| Dynamics of HIV-1 infected target cells [6]                                                          | System of distributed DDEs                                                 | Cell-to-cell spread of HIV-1, well-mixed system                                                                                                 | Existence of sustained oscillations of infection for typical tissue culture parameters                         | Key role of latently infected cells in sustaining the infection, HIV persistence in the form of infective oscillations                                    |
| Spatiotemporal dynamics of virus - target cell system in HIV infection [7]                           | System of PDEs describing infection, replication, diffusion and chemotaxis | 2D surface domain, purely Brownian motion of cells, bounded rate chemotactic movement                                                           | The speed of the pattern propagation, the spatial frequency and amplitude of the density variation (hot spots) | Initial foci of HIV infection can be established as a result of the virus-target cell dynamics; immune system response may give rise to pattern formation |

| Model                                   | Modelling formalism                                                                         | Key assumptions                                                                                                                                                | Predictions                                                                                                                                                                           | Applications                                                                                                                                  |
|-----------------------------------------|---------------------------------------------------------------------------------------------|----------------------------------------------------------------------------------------------------------------------------------------------------------------|---------------------------------------------------------------------------------------------------------------------------------------------------------------------------------------|-----------------------------------------------------------------------------------------------------------------------------------------------|
| Viral infection in spherical organs [8] | System of reaction-diffusion equations with influx boundary conditions and radial symmetry  | 3D view of infected organ with a spherical shape, viruses and immune cells penetrate organ at the surface and propagate to the inner domain                    | Analytical solutions showing non-uniform distribution of viruses and cells in the organ; the role of diffusivity parameters; temporal and spatial profiles of the infection evolution | Areas of high viral concentration in organs; lack of accessibility of some inner parts of the organs for the immune cells and antiviral drugs |
| Virus growth in vitro [9]               | System of master equations for the evolution of the number of infected cell in foci for HCV | Cell-to-cell mode of viral spread in the in vitro culture; no cell death; empirical density function for the time to infection of the founding cell in a focus | Growth of larger foci is best explained by the birth model; growth of the smaller foci is better described by the boundary model                                                      | Quantitative analysis of the efficacy for blocking HCV cell-to-cell spread when targeting different host factors                              |

## References

1. Strain MC, Richman DD, Wong JK, Levine. Spatiotemporal dynamics of HIV propagation. *J Theor Biol.* 2002, 218(1):85-96.
2. Haseltine EL, Lam V, Yin J, Rawlings JB. Image-guided modeling of virus growth and spread. *Bull Math Biol.* 2008, 70(6):1730-48
3. Beauchemin C. Probing the effects of the well-mixed assumption on viral infection dynamics. *J Theor Biol.* 2006, 242(2):464-77.
4. Levin D, Forrest S, Banerjee S, Clay C, Cannon J, Moses M, Koster F. A spatial model of the efficiency of T cell search in the influenza-infected lung. *J Theor Biol.* 2016, 398:52-63
5. Funk GA, Jansen VA, Bonhoeffer S, Killingback T. Spatial models of virus-immune dynamics. *J Theor Biol.* 2005, 233(2):221-36.
6. Culshaw RV, Ruan S, Webb G. A mathematical model of cell-to-cell spread of HIV-1 that includes a time delay. *J Math Biol.* 2003, 46(5):425-44.
7. Stancevic O, Angstmann CN, Murray JM, Henry BI. Turing patterns from dynamics of early HIV infection. *Bull Math Biol.* 2013, 75(5):774-95.
8. Dunia R, Bonnecaze R. Mathematical modeling of viral infection dynamics in spherical organs. *J Math Biol.* 2013;67(6-7):1425-55.

9. Graw F, Martin DN, Perelson AS, Uprichard SL, Dahari H. Quantification of Hepatitis C Virus Cell-to-Cell Spread Using a Stochastic Modeling Approach. *J Virol*. 2015;89(13):6551-61.
